# Supplementary material
Source: PubMed Central journal article supplement (PMC6472700)
Supplement: NIHMS1019582-supplement-S_Table_1.pdf [file NIHMS1019582-supplement-S_Table_1.pdf]

**Supplemental Table 1-** Clinical features of the 7 patients who developed chronic injury versus the 6 who had resolution of injury within six months of onset of terbinafine induced liver injury.\*

|                               | <b>Chronic Injury<br/>n=7</b> | <b>Resolved<br/>n=6</b> | <b>p-value</b> |
|-------------------------------|-------------------------------|-------------------------|----------------|
| Median Age (yrs.)             | 53.8                          | 59.0                    | 0.19           |
| % Female                      | 71%)                          | 33%                     | 0.29           |
| Race                          |                               |                         |                |
| % Caucasian/White             | 71%                           | 83%                     | 0.99           |
| % African- American/Black     | 14%                           | 0%                      |                |
| % Asian                       | 14%                           | 17%                     |                |
| % Hispanic/Latino             | 0%                            | 17%                     | 0.46           |
| BMI (kg/m2)                   | 22.3                          | 24.6                    | 0.12           |
| Medical history               |                               |                         |                |
| % Drug allergies              | 29%                           | 17%                     | 0.99           |
| % Diabetes                    | 0%                            | 17%                     | 0.46           |
| % Alcohol use                 | 57%                           | 67%                     | 0.99           |
| Symptoms                      |                               |                         |                |
| Jaundice (%)                  | 71%                           | 83%                     | 0.99           |
| Pruritis (%)                  | 86%                           | 67%                     | 0.56           |
| Rash (%)                      | 0%                            | 50%                     | 0.070          |
| Fever (%)                     | 9%                            | 17%                     | 0.46           |
| Median duration of use (days) | 35                            | 44                      | 0.12           |
| Laboratory results at onset   |                               |                         |                |
| ALT (U/L)                     | 588                           | 433                     | 0.78           |
| ALP (U/L)                     | 333                           | 327                     | 0.99           |
| Total bilirubin (mg/dL)       | 6.6                           | 3.1                     | 0.57           |
| Peak Laboratory Results       |                               |                         |                |
| ALT (U/L)                     | 604                           | 585                     | 0.89           |
| ALP (U/L)                     | 366                           | 426                     | 0.67           |
| Total bilirubin (mg/dL)       | 12.9                          | 9.8                     | 0.47           |
| Management                    |                               |                         |                |
| % Corticosteroids             | 29%                           | 33%                     | 0.99           |
| % Ursodiol                    | 42%                           | 17%                     | 0.56           |
| % HLA-A * 33:01 (+)           | 86%                           | 67%                     | 0.42           |

Data given as median values or number and proportion

\* 2 patients, including one who underwent liver transplantation at 18 days, did not have 6 months of follow up.
