# Supplementary material
Source: PubMed Central journal article supplement (PMC6472700)
Supplement: NIHMS1019582-supplement-S_Table_2.pdf [file NIHMS1019582-supplement-S_Table_2.pdf]

**Supplemental Table 2:** Laboratory values of 7 subjects with chronic DILI from terbinafine during prolonged follow-up.

| <b>Parameter<br/>Median (range)</b> | <b>At DILI onset</b> | <b>Baseline DILIN<br/>study visit</b> | <b>Month 6 study<br/>visit</b> | <b>Month 12<br/>study visit</b> | <b>Month 24<br/>study visit</b> |
|-------------------------------------|----------------------|---------------------------------------|--------------------------------|---------------------------------|---------------------------------|
| ALT (U/L)                           | 588<br>(131-1071)    | 380<br>(90-1133)                      | 61<br>(37-280)                 | 89<br>(41- 51)                  | 49<br>(25-109)                  |
| ALP (U/L)                           | 333<br>(203-452)     | 314<br>(203-452)                      | 259<br>(163-431)               | 215<br>(111-398)                | 128<br>(76-339)                 |
| Total Bilirubin<br>(mg/dL)          | 6.6<br>(0.7-11.6)    | 6.6<br>(0.7-12.3)                     | 0.7<br>(0.4-1.4)               | 0.7<br>(0.3-1.0)                | 0.6<br>(0.3-1.1)                |

Data presented as Median (range)
