# Supplementary material
Source: PubMed Central journal article supplement (PMC6472700)
Supplement: NIHMS1019582-supplement-S_Table_3.pdf [file NIHMS1019582-supplement-S_Table_3.pdf]

**Supplemental Table 3: Alignments of HLA A\*33:01 with HLA- A \*33:03.**

|               |            |            |            |             |            |            |            |            |            |            |
|---------------|------------|------------|------------|-------------|------------|------------|------------|------------|------------|------------|
| AA Pos.       | -21        | -11        | -1         | 10          | 20         | 30         | 40         | 50         | 60         | 70         |
| A*33:03:02    | ****       | *****      | *****      | *SHSMRYFTT  | SVSRPGRGEP | RPIAVGYVDD | TQFVRFSDA  | ASQRMEPRAP | WIEQEGPEYW | DRNTRNVKAH |
| A*33:01:01:01 | MAVM       | APRTLLLLL  | GALALTQ    | TWA         | G-----     | -----      | -----      | -----      | -----      | -----      |
| A*33:01:01:02 | MAVM       | APRTLLLLL  | GALALTQ    | TWA         | G-----     | -----      | -----      | -----      | -----      | -----      |
|               |            |            |            |             |            |            |            |            |            |            |
| AA Pos.       | 80         | 90         | 100        | 110         | 120        | 130        | 140        | 150        | 160        | 170        |
| A*33:03:02    | SQIDRVDLGT | LRGYYNQSEA | GSHTIQMMYG | CDVGS DGRFL | RGYQQDAYDG | KDYIALNEDL | RSWTAADMAA | QITQRKWEAA | RVAEQLRAYL | EGTCVEWLR  |
| A*33:01:01:01 | -----      | -----      | -----      | -----       | -----      | -----      | -----      | -----      | -----      | -----      |
| A*33:01:01:02 | -----      | -----      | -----      | -----       | -----      | -----      | -----      | -----      | -----      | -----      |
|               |            |            |            |             |            |            |            |            |            |            |
| AA Pos.       | 180        | 190        | 200        | 210         | 220        | 230        | 240        | 250        | 260        | 270        |
| A*33:03:02    | YLENGKETLQ | RT*****    | *****      | *****       | *****      | *****      | *****      | *****      | *****      | *****      |
| A*33:01:01:01 | H-----     | --DPPRTHMT | HHAVSDHEAT | LRCWALSFP   | AEITLTWQRD | GEDQIQDTEL | VETRPAGDGT | FQKWASVVVP | SGQEQRYTCH | VQHEGLPKPL |
| A*33:01:01:02 | H-----     | --DPPRTHMT | HHAVSDHEAT | LRCWALSFP   | AEITLTWQRD | GEDQIQDTEL | VETRPAGDGT | FQKWASVVVP | SGQEQRYTCH | VQHEGLPKPL |
|               |            |            |            |             |            |            |            |            |            |            |
| AA Pos.       | 280        | 290        | 300        | 310         | 320        | 330        | 340        |            |            |            |
| A*33:03:02    | *****      | *****      | *****      | *****       | *****      | *****      | *****      | *          |            |            |
| A*33:01:01:01 | TLRWEPSQP  | TPIVGIAG   | LVLFGAVFAG | AVVAAVRWR   | KSSDRKGGSY | SQAASSDAQ  | GSDMSLTACK | V          |            |            |
| A*33:01:01:02 | TLRWEPSQP  | TPIVGIAG   | LVLFGAVFAG | AVVAAVRWR   | KSSDRKGGSY | SQAASSDAQ  | GSDMSLTACK | V          |            |            |
