# Supplementary material
Source: PubMed Central journal article supplement (PMC6472700)
Supplement: NIHMS1019582-supplement-S_Table_4.pdf [file NIHMS1019582-supplement-S_Table_4.pdf]

**Supplementary Table 4: HLA A, B, C genotypes of individual patients with suspected Terbinafine hepatotoxicity**

| <b>Case #</b> | <b>HLA-A Type</b>     | <b>HLA-B Type</b>     | <b>HLA-C Type</b>     | <b>Genetic ethnicity</b> | <b>Terbinafine Causality score</b> |
|---------------|-----------------------|-----------------------|-----------------------|--------------------------|------------------------------------|
| <b>1</b>      | 33:01:01G + 25:01:01G | 14:02:01G + 18:01:01G | 08:02:01G + 12:03:01G | Jewish or Middle Eastern | Very likely                        |
| <b>2</b>      | 33:01:01G + 68:02:01G | 14:02:01G + 14:02:01G | 08:02:01G + 08:02:01G | Jewish or Middle Eastern | Definite                           |
| <b>3</b>      | 33:01:01G + 25:01:01G | 14:02:01G + 18:01:01G | 08:02:01G + 12:03:01G | Jewish or Middle Eastern | Definite                           |
| <b>4</b>      | 33:01:01G + 26:01:01G | 14:02:01G + 38:01:01  | 08:02:01G + 12:03:01G | Jewish or Middle Eastern | Definite                           |
| <b>5</b>      | 33:03:01G + 24:02:01G | 40:01:01G + 44:03:01G | 03:04:01G + 14:03     | East Asian               | Definite                           |
| <b>6</b>      | 33:01:01G + 26:01:01G | 14:02:01G + 15:01:01G | 08:02:01G + 03:04:01G | Northern European        | Definite                           |
| <b>7</b>      | 32:01:01G + 24:02:01G | 08:01:01G + 44:02:01G | 05:01:01G + 07:01:01G | Northern European        | Very likely                        |
| <b>8</b>      | 33:01:01G + 01:01:01G | 14:02:01G + 08:01:01G | 08:02:01G + 07:01:01G | Jewish or Middle Eastern | Definite                           |
| <b>9</b>      | 33:01:01G + 32:01:01G | 14:02:01G + 07:02:01G | 08:02:01G + 07:02:01G | Northern European        | Definite                           |
| <b>10</b>     | 33:01:01G + 32:01:01G | 14:02:01G + 40:01:01G | 08:02:01G + 03:04:01G | Other European           | Definite                           |
| <b>11</b>     | 33:01:01G + 32:01:01G | 14:02:01G + 44:02:01G | 08:02:01G + 07:04:01G | Southern European        | Definite                           |
| <b>12</b>     | 24:02:01G + 24:02:01G | 39:06:02G + 40:02:01G | 03:06:01 + 07:02:01G  | Hispanic                 | Probable                           |
| <b>13</b>     | 33:03:01G + 24:02:01G | 15:12:01G + 40:06:01G | 08:01:01G + 03:03:01G | East Asian               | Definite                           |
| <b>14</b>     | 33:01:01G + 26:01:01G | 14:02:01G + 27:05:02G | 08:02:01G + 01:02:01G | Jewish or Middle Eastern | Definite                           |
| <b>15</b>     | 33:01:01G + 30:02:01G | 14:02:01G + 15:10:01  | 08:02:01G + 03:04:02G | African American         | Very likely                        |
| <b>16</b>     | 01:01:01G + 68:02:01G | 15:17:01G + 57:03:01G | 03:04:02G + 07:01:01G | Hispanic                 | Possible                           |
| <b>17</b>     | 11:01:01G + 11:02:01G | 15:02:01G + 56:03     | 01:02:01G + 08:01:01G | East Asian               | Possible                           |
| <b>18</b>     | 02:01:01G + 03:01:01G | 07:02:01G + 35:01:01G | 04:01:01G + 07:02:01G | Hispanic                 | Unlikely                           |
| <b>19</b>     | 01:01:01G + 01:01:01G | 08:01:01G + 08:01:01G | 07:01:01G + 07:01:01G | Northern European        | Possible                           |
